# Supplementary material for: Long-term exposure to air pollution and hospitalization for dementia in the Rome longitudinal study
Source: Environ Health. 2019 Aug 9;18:72. doi: 10.1186/s12940-019-0511-5 (PMC6689157; doi:10.1186/s12940-019-0511-5)
Supplement: Supplementary file 6 — Association between long-term exposure to air pollution and first hospitalization for Alzheimer’s disease. Sensitivity analyses, Rome 2001–2013. (DOCX 16 kb) [file 12940_2019_511_MOESM6_ESM.docx]

**Additional file 6.** Association between long-term exposure to air pollution and first hospitalization for Alzheimer's disease. Sensitivity analyses, Rome 2001-2013

| **Exposure** | **Comorbidities adjustment** | | | **Competing risk** | | | **Narrower case definition** | | | **Primary diagnosis** | | | **Non movers** | | |
| --- | --- | --- | --- | --- | --- | --- | --- | --- | --- | --- | --- | --- | --- | --- | --- |
|  | **N=9,712** | | | **N=9,712** | | | **N=2,038** | | | **N=4,158** | | | **N=6,664** | | |
|  | **HR1** | **95%CI** | | **HR2** | **95%CI** | | **HR3** | **95%CI** | | **HR4** | **95%CI** | | **HR5** | **95%CI** | |
| PM10 *(10µg/m3) | 0.95 | 0.91 | 0.99 | 0.95 | 0.91 | 1.00 | 0.96 | 0.87 | 1.04 | 0.94 | 0.88 | 1.00 | 0.93 | 0.89 | 0.98 |
| Coarse *(5µg/m3) | 0.91 | 0.87 | 0.94 | 0.92 | 0.88 | 0.96 | 0.92 | 0.85 | 0.99 | 0.87 | 0.83 | 0.92 | 0.90 | 0.86 | 0.94 |
| PM2.5 *(5µg/m3) | 0.91 | 0.85 | 0.97 | 0.93 | 0.86 | 0.99 | 0.93 | 0.82 | 1.05 | 0.89 | 0.81 | 0.97 | 0.89 | 0.83 | 0.95 |
| PM2.5 abs *(10-5/m) | 0.91 | 0.86 | 0.96 | 0.92 | 0.87 | 0.97 | 0.93 | 0.83 | 1.02 | 0.90 | 0.83 | 0.97 | 0.91 | 0.85 | 0.96 |
| NO2 *(10µg/m3) | 0.91 | 0.89 | 0.94 | 0.92 | 0.89 | 0.94 | 0.90 | 0.86 | 0.95 | 0.89 | 0.86 | 0.92 | 0.91 | 0.89 | 0.93 |
| NOx *(20µg/m3) | 0.96 | 0.94 | 0.98 | 0.96 | 0.94 | 0.98 | 0.94 | 0.90 | 0.97 | 0.92 | 0.90 | 0.95 | 0.95 | 0.93 | 0.97 |
| O3 *(10µg/m3) | 0.98 | 0.95 | 1.02 | 0.99 | 0.95 | 1.02 | 0.96 | 0.89 | 1.03 | 0.97 | 0.91 | 1.02 | 0.98 | 0.93 | 1.02 |

1 HR adjusted for age, education, place of birth, marital status, comorbidities (Chronic Obstructive Pulmonary Disease, diabetes and brain injuries), area-based socioeconomic position with baseline hazard function stratified by sex.

2 HR Models adjusted for gender, education, place of birth, marital status and area-based socioeconomic position with baseline hazard function stratified by sex, with death as competing risk.

3 HR adjusted for age, education, place of birth, marital status, area-based socioeconomic position with baseline hazard function stratified by sex. The selection of case was based on the first of at least two hospital discharges.

4 HR adjusted for age, education, place of birth, marital status, area-based socioeconomic position with baseline hazard function stratified by sex. The selection of case was based on primary diagnosis only.

5 HR adjusted for age, education, place of birth, marital status, area-based socioeconomic position with baseline hazard function stratified by sex in subject that not change residence during the follow up.
